# Supplementary material for: Replication catastrophe is responsible for intrinsic PAR glycohydrolase inhibitor-sensitivity in patient-derived ovarian cancer models
Source: PubMed Central journal article supplement (PMC8520217; doi:10.1186/s13046-021-02124-0), 2021-10-16
Supplement: 13046_2021_2124_MOESM9_ESM.pdf [file 13046_2021_2124_MOESM9_ESM.pdf]

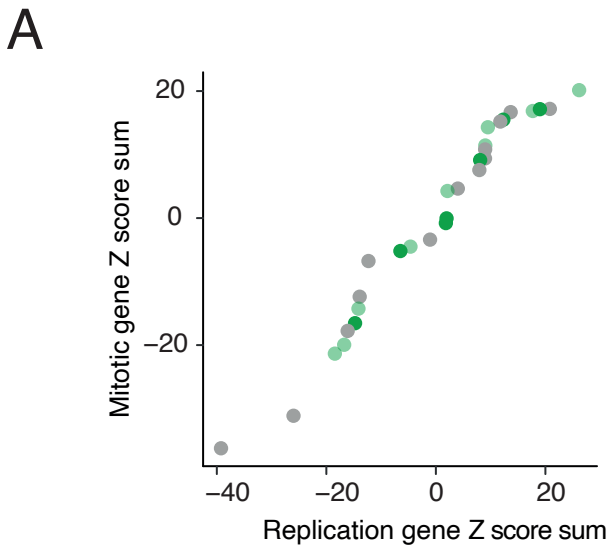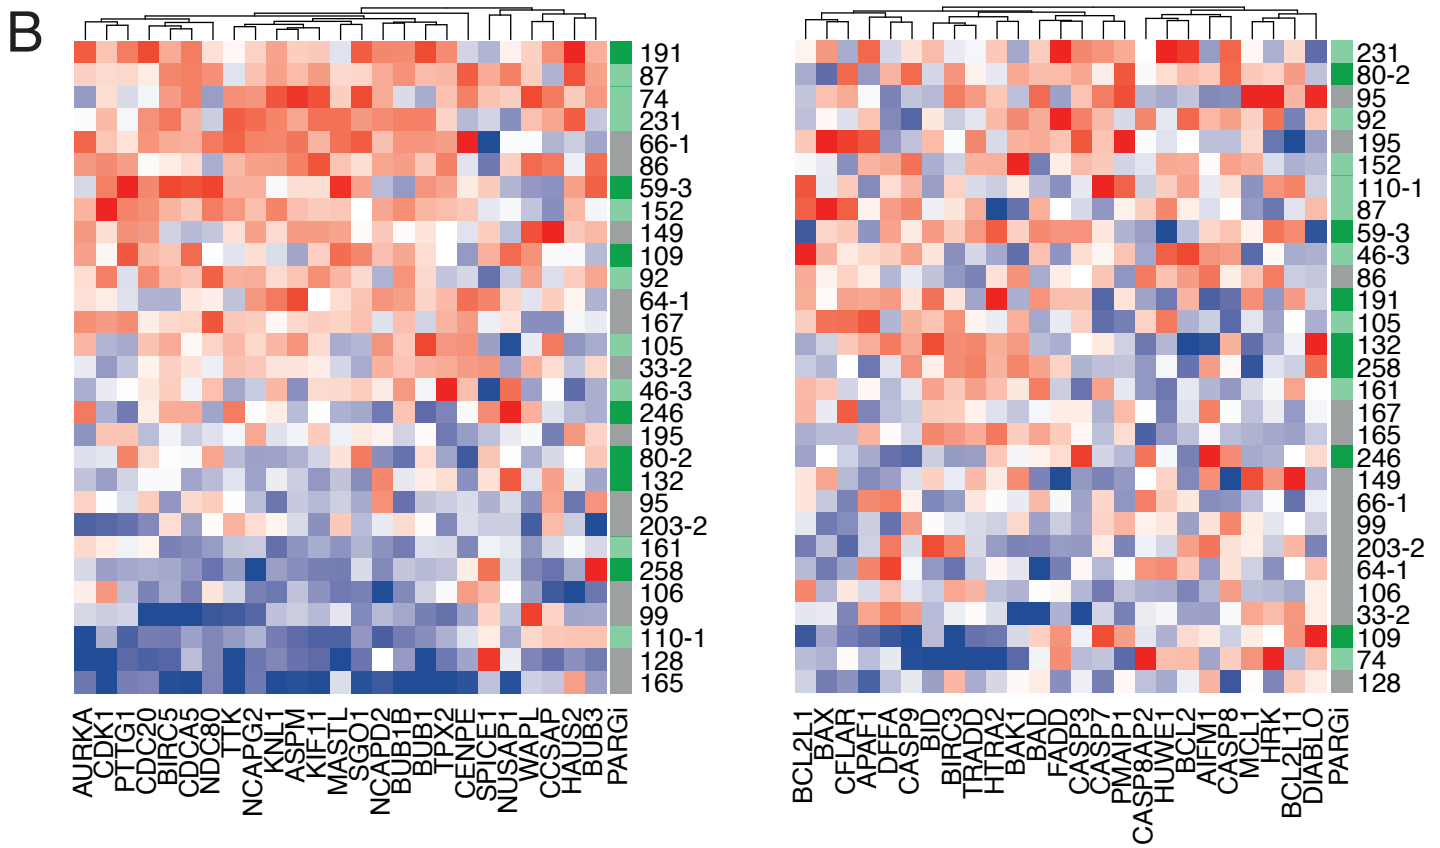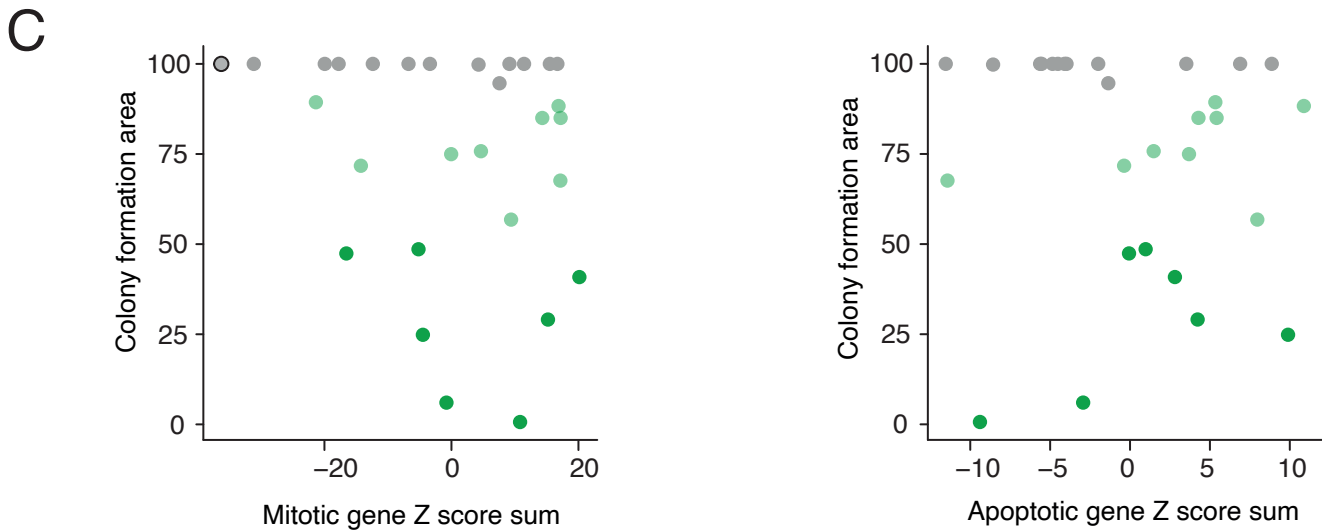

Figure S9
