# Supplementary material for: Replication catastrophe is responsible for intrinsic PAR glycohydrolase inhibitor-sensitivity in patient-derived ovarian cancer models
Source: PubMed Central journal article supplement (PMC8520217; doi:10.1186/s13046-021-02124-0), 2021-10-16
Supplement: 13046_2021_2124_MOESM10_ESM.pdf [file 13046_2021_2124_MOESM10_ESM.pdf]

Supplementary Tables

Supplementary Table 1. Clinical data, OCMs and primary tumour blocks

| OCM   | Patient demographics |                    |           |                                  |                        |         | Ex vivo culture |      |     |       |                 | Primary tumour |      |     |
|-------|----------------------|--------------------|-----------|----------------------------------|------------------------|---------|-----------------|------|-----|-------|-----------------|----------------|------|-----|
|       | FIGO stage           | Histology          | gBRCAm    | Prior lines of CT <sub>x</sub> * | Platinum Sensitivity * | OS (mo) | IF              |      |     | IB    | Sanger          | IHC            |      |     |
|       |                      |                    |           |                                  |                        |         | CK7             | PAX8 | p53 | p53   | TP53m RT-PCR    | CK7            | PAX8 | p53 |
| 80-2  | 3C                   | HGSOC              | BRCA1     | 2                                | Sens                   | -       | P               |      |     | +(S)  | p.R248W         |                |      |     |
| 86    | 4B                   | HGSOC              | Unknown   | 3                                | Res                    | 25.0    |                 | W    |     | -     | p.D281G         |                |      |     |
| 92    | 3C                   | HGSOC              | Unknown   | 1                                | Res                    | 9.6     |                 | W    |     | -     | WT              | P              |      |     |
| 95    | 3C                   | HGSOC              | WT        | 4                                | Res                    | 39.7    |                 |      |     | +(sm) | FR              |                |      |     |
| 99    | 3C                   | HGSOC              | BRCA2 VUS | 0                                | CN                     | 39.5    | P               |      |     | +     | p.F270L         |                |      |     |
| 105   | 3C                   | HGSOC              | BRCA1 VUS | 3                                | Ref                    | 21.4    |                 |      |     | +(S)  | p.Q105P         | F              |      |     |
| 106   | 3C                   | HGSOC              | WT        | 7                                | Res                    | 62.1    |                 |      |     | -     | p.R282W         |                |      |     |
| 109   | 4B                   | HGSOC              | Unknown   | 3                                | Res                    | 26.8    |                 |      |     | +(S)  | p.R248Q         | F              |      |     |
| 110-1 | 3C                   | HGSOC              | WT        | 0                                | CN                     | 7.7     |                 |      |     | -     | p.R248Q         |                |      |     |
| 128   | 3C                   | HGSOC              | Unknown   | 2                                | Sens                   | 25.9    |                 |      |     | -     | FR              |                |      |     |
| 132   | 3C                   | HGSOC              | WT        | 2                                | Res                    | -       |                 |      |     | -     | p.R248W         |                |      | NE  |
| 149   | 3C                   | HGSOC              | WT        | 5                                | Res                    | 57.6    |                 | W    |     | +     | p.R248L         |                |      |     |
| 152   | 3C                   | HGSOC <sup>†</sup> | Unknown   | 5                                | Res                    | 55.9    |                 |      |     | +     | p.Y220C         |                |      |     |
| 161   | 4A                   | HGSOC              | Unknown   | 2                                | Res                    | 29.4    |                 | W    |     | -     | WT              |                |      |     |
| 162-2 | 3C                   | HGSOC              | WT        | 4                                | Res                    | 39.9    |                 | W    |     | -     | Exon 6 deletion | S              |      |     |
| 165   | 3C                   | HGSOC              | Unknown   | 3                                | Res                    | 17.7    |                 |      |     | +     | p.Y220C         | S              |      |     |
| 167   | 3C                   | HGSOC              | Unknown   | 3                                | Res                    | 29.8    |                 | W    |     | +     | WT              |                |      |     |
| 191   | 3A                   | HGSOC              | BRCA1     | 2                                | Res                    | 17.8    |                 |      |     | +(S)  | p.R248Q         |                | P    |     |
| 195   | 4A                   | HGSOC <sup>‡</sup> | Unknown   | 0                                | CN                     | 10.2    |                 | W    |     | +(S)  | WT              | ‡              | ‡    | ‡   |
| 203-2 | 3C                   | HGSOC              | BRCA1     | 6                                | Res                    | 69.5    |                 |      |     | +     | p.R342P         |                |      |     |
| 231   | 3C                   | HGSOC              | WT        | 0                                | CN                     | -       |                 |      |     | +     | p.R248G         |                |      |     |
| 246   | 4A                   | HGSOC              | BRCA2     | 4                                | Res                    | 61.3    |                 |      |     | -     | NS              |                |      |     |
| 250-2 | 3C                   | HGSOC              | BRCA1     | 3                                | Res                    | -       |                 |      |     | +(S)  | p.I195N         |                |      |     |
| 258   | 3C                   | HGSOC              | Unknown   | 1                                | Res                    | 14.2    |                 |      |     | +(sm) | FR              |                |      |     |
| 267   | 4B                   | HGSOC              | WT        | 2                                | Res                    | 25.4    |                 |      |     | +(S)  | p.Y220C         |                |      |     |

Supplementary Table 2. *BRCA1/2* variants detected in OCMs

| OCM  | Germline <i>BRCA1/2</i> variant                             | OCM                                                          |                   |                    |        |
|------|-------------------------------------------------------------|--------------------------------------------------------------|-------------------|--------------------|--------|
|      |                                                             | <i>BRCA1/2</i> variant                                       | Variant type      | Classification     | VAF    |
| 46-3 | Unknown                                                     | WT                                                           | -                 | -                  | -      |
| 99   | <i>BRCA2</i> :c.316+13A>G (p.?) Intronic variant (VUS)      | WT                                                           | -                 | -                  | -      |
| 105  | <i>BRCA1</i> :c.5452G>A p.(Asp1818Asn)<br>Missense (VUS)    | <i>BRCA1</i> :c.5452G>A (p.Asp1818Asn)                       | MS                | VUS                | 0.51   |
| 109  | Unknown                                                     | <i>BRCA1</i> :c.329dup (p.Glu111GlyfsTer3)                   | FR                | Pathogenic         | 0.92   |
| 152  | Unknown                                                     | WT                                                           | -                 | -                  | -      |
| 191  | <i>BRCA1</i> :c.3268C>T<br>(p.Gln1090Ter) Nonsense          | <i>BRCA1</i> :c.3268C>T (p.Gln1090Ter)                       | NS                | Pathogenic         | 0.99   |
|      |                                                             | <i>BRCA2</i> :c.4725C>G (p.Asp1575Glu)                       | MS                | VUS                | 1.0    |
| 246  | <i>BRCA2</i> :c.5946del (p.Ser1982ArgfsTer22)<br>Frameshift | <i>BRCA2</i> :c.5087_6841del<br>(p.Ile1697_Gly2281del)       | In-frame deletion | Putative reversion | Sanger |
|      |                                                             | <i>BRCA2</i> :c.4946_6841del<br>(p.Lys1649_Gly2281delinsArg) | In-frame deletion | Putative reversion | Sanger |

Supplementary Table 3. EC<sub>50</sub> values for OCMs for the inhibitors/compounds tested.

| OCM  | EC <sub>50</sub> values |               |                |                |                 |
|------|-------------------------|---------------|----------------|----------------|-----------------|
|      | PARGi (μM)              | Olaparib (μM) | Niraparib (μM) | Cisplatin (μM) | Paclitaxel (nM) |
| 46-3 | NC                      | 7.7±0.9       | -              | 0.9±0.1        | 5.6±0.3         |
| 99   | NC                      | 6.2±1.3       | -              | 0.8±0.2        | 7.6±1.2         |
| 105  | NC                      | 16.1±9.0      | -              | 1.3±0.1        | 4.4±0.5         |
| 109  | 0.09±0.01               | 14.5±1.4      | 10.3±3.1       | 1.1±0.1        | 6.9±1.1         |
| 152  | NC                      | 2.9±1.3       | -              | 1.2±0.2        | 3.3±0.2         |
| 191  | 3.2±0.1                 | 2.5±0.2       | -              | 0.7±0.3        | 5.8±0.9         |
| 246  | 0.2±0.1                 | 3.9±0.4       | 4.4±0.5        | 0.7±0.3        | 27.1±4.9        |
